# Supplementary material for: Rehabilitation Technologies for Chronic Conditions: Will We Sink or Swim?
Source: MDPI journal article supplement (doi:10.3390/healthcare11202751), 2023-10-17
Supplement: s1 [file s1]

**Table S1.** Technology Specifications for Exoskeletons.

| Author         | Study Design                 | Use                           | Joints           | Powered vs passive, pseudo passive, hybrid | Portable vs stationary | Materials (hard vs soft) | Degree of freedom (DOF) specified |
|----------------|------------------------------|-------------------------------|------------------|--------------------------------------------|------------------------|--------------------------|-----------------------------------|
| Calafiore[43]  | Systematic Review            | Gait training                 | NS               | powered and hybrid                         | both                   | hard                     | NS                                |
| Hsu[7]         | Systematic Review + meta     | Gait training                 | hip, knee        | powered                                    | portable               | NS                       | NS                                |
| Karunakaran[6] | Systematic Review            | Gait training                 | hip, knee, ankle | powered                                    | portable               | hard                     | NS                                |
| Leow[8]        | Systematic Review            | Gait training                 | hip, knee, ankle | powered                                    | portable               | NS                       | NS                                |
| Carmignano[44] | Systematic Review            | Gait training                 | hip, knee, ankle | powered and hybrid                         | both                   | hard                     | NS                                |
| Picelli[45]    | Systematic Review            | Gait training                 | Lower extremity  | powered                                    | both                   | NS                       | NS                                |
| Bowman[46]     | Systematic Review            | Gait training                 | NS               | powered                                    | stationary             | hard                     | NS                                |
| Calabro[47]    | Systematic Review            | Gait training                 | hip, knee, ankle | powered                                    | both                   | hard                     | NS                                |
| Hayes[49]      | Systematic Review            | Gait training                 | lower extremity  | powered                                    | both                   | hard                     | NS                                |
| Zhang[50]      | Systematic Review            | Gait training                 | hip, knee, ankle | powered and non-powered                    | portable               | hard                     | 2*                                |
| Dijkers[48]    | Review of Systematic Reviews | Gait training                 | NS               | powered                                    | both                   | hard                     | NS                                |
| McGibbon[51]   | Randomized controlled trial  | Assisted physical performance | knee             | powered                                    | portable               | hard                     | NS                                |

NS: Not Specified in article

\*Only reported for 1 study in the review

**Table S2.** Technology Specifications for Augmented and Virtual Reality.

| Author        | Study Design             | AR /VR    | Immersion Type (non, fully, semi) | Tracking System                                   | Gaming Component Present in intervention |
|---------------|--------------------------|-----------|-----------------------------------|---------------------------------------------------|------------------------------------------|
| Chu[58]       | Systematic Review + Meta | VR        | fully, semi, and non              | fixed screens, headsets, large screen projections | both                                     |
| Demeco[11]    | Systematic Review        | VR        | fully                             | headsets and large screen projection              | both                                     |
| Gil[70]       | Systematic Review + Meta | AR        | non                               | headsets, handheld (tablets), projections         | both                                     |
| Heffernan[59] | Systematic Review        | VR and AR | fully                             | headsets, large screen projector, glasses for AR  | NS                                       |

|                   |                             |    |                      |                                          |      |
|-------------------|-----------------------------|----|----------------------|------------------------------------------|------|
| Kwon[12]          | Systematic Review + Meta    | VR | non and semi         | NS                                       | yes  |
| Mohamed Hazza[60] | Systematic Review + Meta    | VR | fully, semi, and non | headsets, fixed screens                  | both |
| Sevcenko[10]      | Systematic Review           | VR | semi and non         | fixed screen                             | yes  |
| Blasco[61]        | Systematic Review           | VR | non                  | fixed screen                             | yes  |
| Choi[62]          | Systematic Review +Meta     | VR | non and fully        | headsets                                 | both |
| Youssef[63]       | Systematic Review           | VR | non and fully        | one fixed screen, rest unspecified       | both |
| Guo[64]           | Systematic Review +Meta     | VR | NS                   | one used a headset, the rest unspecified | both |
| Ye[65]            | Systematic Review +Meta     | VR | non, fully, semi     | head mounted devices, fixed screen       | both |
| Lee.[71]          | Randomized Controlled Trial | VR | non                  | fixed                                    | no   |
| Bouraghi [68]     | Systematic Review           | VR | NS                   | NS                                       | NS   |
| Garcia-Bravo[67]  | Systematic Review           | VR | semi                 | fixed, handheld                          | yes  |
| Blasco-Peris[66]  | Systematic Review + Meta    | VR | fully and semi       | fixed, handheld, headset                 | both |
| Rutkowski [72]    | Randomized Controlled Trial | VR | non and semi         | fixed                                    | yes  |

AR: Augmented Reality; VR: Virtual Reality; non: non immersive; fully: fully immersive; semi: semi-immersive; NS: Not Specified in article

**Table S3.** Technology Specifications for Remote Monitoring.

| Author           | Study Design                | What is monitored                            | Mode of monitoring                                      | Type of sensor                  |
|------------------|-----------------------------|----------------------------------------------|---------------------------------------------------------|---------------------------------|
| Dorsch[77]       | Randomized Controlled Trial | walking activity                             | wearable external sensor                                | accelerometer                   |
| Lynch[78]        | Systematic Review           | physical activity                            | wearable external sensors, smartphone applications      | accelerometers, GPS, gyroscopes |
| Ozden[79]        | Systematic review + Meta    | physical activity and exercise prescriptions | wearable external sensors, smartphone applications      | NS                              |
| Christiansen[83] | Randomized Controlled Trial | physical activity                            | wearable external sensor                                | actigraph                       |
| Mehta[84]        | Randomized Controlled Trial | physical activity, goals, pain               | wearable external sensor, messaging system              | accelerometer                   |
| Nick[91]         | Systematic Review + Meta    | physiological, weight, symptoms              | Phone/tablet applications connected to external sensors | NS                              |

|                   |                             |                                                                    |                                                                                       |                                                                 |
|-------------------|-----------------------------|--------------------------------------------------------------------|---------------------------------------------------------------------------------------|-----------------------------------------------------------------|
| Zhong[89]         | Systematic review + Meta    | exercise, physiological signs, risk factors                        | phone applications, wearable external sensors, and social media management platforms. | NS                                                              |
| Ramachandran [90] | Systematic review + Meta    | exercise, physiological signs                                      | phone applications, external wearable sensors, external non wearable sensors          | pedometers, accelerometers, heart rate monitor                  |
| Maddison [92]     | Randomized Controlled Trial | exercise monitoring, physiological signs, ECG, geo positional data | external wearable sensor                                                              | accelerometer, ECG                                              |
| Zanaboni[87]      | Randomized Controlled Trial | Exercise, self-management                                          | external wearable sensor, website                                                     | oximetry sensor                                                 |
| Benzo[86]         | Randomized Controlled Trial | activity                                                           | external sensors paired with tablet                                                   | actigraph sensor                                                |
| Stamenova[88]     | Randomized Controlled Trial | Physiological signs                                                | Bluetooth devices: external sensors paired with a tablet                              | piezoelectric sensor, pulse oximetry sensor, temperature sensor |
| Michaud [85]      | Systematic review + Meta    | Physiological signs, physical activity                             | Phone application, external sensors (wearable and unwearable), telehealth software    | NS                                                              |

NS: Not Specified in article; GPS: Global Position Systems; ECG: electrocardiogram
